# Supplementary material
Source: PubMed Central journal article supplement (PMC3709006)
Supplement: NIHMS483352-supplement-01.pdf [file NIHMS483352-supplement-01.pdf]

## LIST OF SUPPLEMENTARY DIGITAL CONTENT

### Addendum 1: Complete search strategy

#### **1. PUBMED**

Tuberculosis AND resistan\* [tiab]

OR

"Tuberculosis, Multidrug-Resistant"[Mesh] OR "multidrug resistant tuberculosis"[tiab] OR "drug resistant tuberculosis"[tiab] OR "multidrug resistant tb"[tiab] OR "drug resistant tb" OR "multi drug resistant tuberculosis"[tiab] OR "multi drug resistant tb"[tiab] OR "mdr tb"[tiab] OR "dr tb"[tiab]

AND

Infant[MeSH Terms] OR Child[MeSH Terms] OR Adolescent[MeSH Terms] OR child\*[tiab] OR adolescen\*[tiab] OR infan\*[tiab] OR neonate\*[tiab] OR newborn\*[tiab] OR new born\*[tiab] OR baby[tiab] OR babies[tiab] OR toddler\*[tiab] OR teen\*[tiab] OR boy[tiab] OR boys[tiab] OR girl\*[tiab] OR pediatric[tiab] OR "paediatric"[tiab] OR puber\*[tiab] OR pubescen\*[tiab] OR prepubescen\*[tiab] OR prepuberty\*[tiab]

#### **2. EMBASE**

Tuberculosis AND resistan\*:ab,ti

OR

'drug resistant tuberculosis'/exp OR "multidrug resistant tuberculosis":ab,ti OR "drug resistant tuberculosis":ab,ti OR "multidrug resistant tb":ab,ti OR "drug resistant tb":ab,ti OR "multi drug resistant tuberculosis":ab,ti OR "multi drug resistant tb":ab,ti OR "mdr tb":ab,ti OR "dr tb":ab,ti AND [embase]/lim

AND

'child'/exp OR 'adolescent'/exp OR child\*:ab,ti OR adolescen\*:ab,ti OR infan\*:ab,ti OR neonate\*:ab,ti OR newborn\*:ab,ti OR 'new born':ab,ti OR 'new borns':ab,ti OR baby:ab,ti OR 'babies':ab,ti OR toddler\*:ab,ti OR teen\*:ab,ti OR 'boy':ab,ti OR 'boys':ab,ti OR girl\*:ab,ti OR pediatric:ab,ti OR paediatric:ab,ti OR puber\*:ab,ti OR pubescen\*:ab,ti OR prepubescen\*:ab,ti OR prepuberty\*:ab,ti AND [embase]/lim

#### **3. LILACS**

tuberculosis OR TB [Words] and resistant OR drug-resistant OR MDR OR XDR OR resistance [Words] and child OR children OR pediatric OR adolescent OR infant OR youth OR teen [Words]
